# Supplementary material
Source: publisher site journal article supplement (https://www.spandidos-publications.com/5830/downloadSupplementary)
Supplement: Supplementary file 1 [file downloadSupplementary]

## Sheet: IgG Donors
Table SI. Information about the patients with COVID-19.
Donor code	Collection date, dd/mm/yy	Sex	Age, years	Severity	Illness onset, dd/mm/yy	COVID+, dd/mm/yy	HC entry	Previous use of medications	Medications	Outcome	Comorbidities	Complications
M001	2020-05-27	F	48	MILD	2020-05-16	2020-05-21	2020-05-22	Tenofovir; lamivudine; dolutegravir; topotecan	Oseltamivir 75 mg (23/05-26/05); ceftriaxone 2g (23/05-26/05); Clexane 40 mg (23/05); ceftriaxone (22/05); prednisone (26/05); azithromycin (22/05-26/05); levofloxacin (26/05)	Discharged	Bulky cervical SCC ECIV (in bilateral lungs + peritoneal implants + ovaries + liver); HIV positive	None
M002	2020-06-01	M	46	MILD	2020-04-27	2020-05-07	2020-05-05	Losartan 50 mg 1x/day; hydrochlorothiazide 25 mg 1x/day	Prophylactic heparin; linezolid (from 28/05); meropenem (from 28/05); ceftriaxone (05/05-09/05); azithromycin (05/05-09/05); fluconazole (08/05-09/05); oseltamivir (05/05-09/05)	Discharged	SAH; hypothyroidism; obesity	Decubitus ulcer; SRAG COVID-19 (orotracheal intubation); acute renal failure; urinary Candida infection
M003	2020-06-01	F	36	MILD	2020-05-15	2020-05-20	2020-05-19	2+1 tacrolimus; prednisone 5 mg; mycophenolate mofetil 500+500; Bactrim	Ceftriaxone (19/05-25/05); azithromycin (19/05-23/05); oseltamivir (19/05-23/05); unfractionated heparin	Discharged	Kidney transplantation in 2008 due to meningomyelocele; recurrent urinary infection	SRAG without the need for orotracheal intubation
M004	2020-08-06	F	49	MILD	2020-04-17	2020-04-22	2020-04-21	Quetiapine 2x/day; furosemide 40 mg via SNE 1x/day; captopril 10 mg in the morning; omeprazole + enoxaparin 60 mg/day; darunavir 600 mg 12/12 h; ritonavir 100 mg 12/12 h; dolutegravir 50 mg 1x/day	Enoxaparin; ceftriaxone (21/04-26/04); azithromycin (21/04-25/04); oseltamivir (22/04); ampicillin 2,000 mg 6/6 h (04/05-12/05); polymyxin B (12/05-14/05); meropenem (11/05-19/05); vancomycin (12/05-19/05)	Discharged	SAH; diabetes mellitus 2; obesity; 2 previous acute myocardial infarctions; HIV (since 2009; previous ART, 3TC + TDF + EFV); CD4 (11/08/2016), 797; CV (02/03/2020), ND; CD4 (28/04/2020), 267; CV (28/04/2020), ND; tuberculosis 2013, treated	None
M005	2020-08-06	M	30	MILD	2020-05-14	2020-05-22	2020-05-22	Carvedilol 6.25 mg 12/12 h; furosemide 40 mg 1x/day; amlopidine 5 mg 12/12 h; hydralazine 25 mg 8/8 h; isosorbide 3x/day	Unfractionated heparin; azithromycin (22/05-25/05); ceftriaxone (22/05-25/05)	Discharged	SAH; heart failure; chronic kidney disease; ex-Etilist	Acute chronic kidney disease; SRAG due to COVID-19
M006	2020-08-06	M	40	MILD	2020-05-23	2020-06-02	2020-06-02	UK	Hydroxychloroquine (26/05-02/06); azithromycin (26/05-02/06); ceftriaxone (26/05-03/06); oseltamivir (26/05-02/06); warfarin; vancomycin (07/06-09/06)	Discharged	Obesity; orthotopic surgery after traffic accident (2008)	SRAG due to COVID-19; upper limb thrombosis
M007	2020-06-17	F	46	MILD	2020-06-11	2020-06-12	2020-06-12	None	Warfarin; enoxaparin 80 mg 12/12 h; ceftriaxone (12/06-14/06); azithromycin (12/06-14/06); oseltamivir (12/06-14/06)	Discharged	Mild to moderate intellectual deficit; psychotic condition	Pulmonary thromboembolism
M008	2020-06-17	F	36	MILD	2020-06-09	2020-06-13	2020-06-13	UK	Tazocin (from 29/06); hydrochlorothiazide 40 mg 12/12 h; methylprednisolone 40 mg 12/12 h; enoxaparin 80 mg 12/12 h; furosemide 40 mg ACM; oseltamivir (14/06-17/06)	Death	Postpartum cesarean section (17/06/2020); pregestational hypothyroidism; HAC; obesity; former smoker	Subsegmental pulmonary thromboembolism; pericardial effusion; SARS due to COVID-19; urinary infection
M009	2020-06-22	M	35	MILD	2020-06-03	2020-06-07	2020-06-08	UK	Enoxaparin; Tazocin (08/06-12/06)	Discharged	Operated distal esophageal adenocarcinoma; VLP esophagectomy with gastric tube (05/28/2020); neoadjuvant chemotherapy (until 03/05/2020); Lynch syndrome; obesity, BMI 42 (130 kg, 1.8 m)	COVID-19 pneumonia
M010	2020-06-24	M	43	MILD	2020-06-15	2020-06-19	2020-06-19	Dipyrone 2 g IV 6/6 h; scopolamine 20 mg IV 6/6; amitriptyline 25 mg PO; paracetamol 500 mg PO 6/6 h; bromopride 8 mg PO every 8 h; methadone 5 mg PO 8/8 h; gabapentin 300 mg at night; cyclobenzaprine 5 mg PO every 12 h	Ceftriaxone (19/06-24/06); azithromycin (19/06-24/06); Tazocin (25/06); dexamethasone; amlodipine besylate; losartan potassium; enoxaparin	Discharged	SAH; diabetes mellitus; alcoholism	Acute renal failure; acute pancreatitis of alcoholic etiology
M011	2020-06-29	M	49	MILD	2020-06-17	2020-06-22	2020-06-23	NPH insulin 25 IU morning; 5 UI Ultra-fast at lunch; morning Xarelto; atenolol at night	Enoxaparin; atenolol; ceftriaxone (23/06-29/06); azithromycin (23/06-28/06)	Discharged	Newly diagnosed diabetes mellitus using insulin; atrial fibrillation in follow-up; prior deep vein thrombosis	SRAG due to COVID-19
M012	2020-06-29	M	34	MILD	13/06/20 (hospitalized for pancreatitis and developed COVID)	2020-06-16	2020-06-17	None	Enoxaparin; tramadol; amitriptyline; colistin (17/06-08/07) => Pseudomonas in abdominal fluid (15/06); tigecycline (17/06-08/07) => Klebsiella and E. coli in abdominal fluid (15/06); metronidazole D (13/06-08/07) => Prevotella and Veilonella in abdominal fluid (08/06); meropenem (07/06-17/06); vancomycin (08/06-17/06); Clavulin (21/04-24/04); ceftriaxone + metronidazole (25/04-28/04); ampicilin +…	Discharged	Severe acute pancreatitis, evolved with infected WON; PO (05/20/20): Ultrasound-guided drainage of WON with metal prosthesis (LAMS) by endoscopy; PO (05/27/20): Replacement of metal prosthesis with plastic + endoscopic necrosectomy + wirsungraphy by endoscopy; PO (06/03/2020): Endoscopic necrosectomy (2nd session); PO (06/09/2020): Drainage of collections through the IR; 1 - epigastric 1,550 ml p…	SRAG due to COVID-19
M013	2020-06-29	M	49	MILD	2020-06-10	2020-06-10	2020-06-12	UK	Oxacilin 2 g 6/6 h, guided by antibriogram (12/06-02/07); piperacillin-tazobactam 4.5 g 6/6 h for RTI (COVID); dexamethasone 4 mg EV 1x/day for malignant intestinal obstruction, at weaning (8 mg X/05 -> 4 mg 13/06); enoxaparin 60 mg 1x/day; omeprazole 40 mg 1x/day; clonazepam 2 mg 1x/night; metoclopramide 10 mg 6/6 h; ondansetron 8 mg 8/8 h; dipyrone 1 g 6/6 h; morphine 4 mg 6/6 h; vitamin B1 100…	Transferred to another institute	Gastric adenocarcinoma pT4a pN1 M0; AP: Poorly differentiated adenocarcinoma with signet-ring cell components, 3.5 cm, with even perigastric adipose tissue. ILF+. IVasc-. IPN+. Free margins. Absence of neoplasia in the lesser curvature. Greater curvature lymph node metastasis (1/4). pT4a N1 Mx; adjuvant QRT (INT-0116 until 01/2020); IH (29/04-02/05): Intestinal subocclusion with improvement after…	SRAG due to COVID-19
M014	2020-06-29	F	42	MILD	2020-06-01	2020-06-11	2020-06-09	UK	NPH insulin; unfractionated heparin; amlodipine besylate; levothyroxine; Tazocin (24/06-30/06); prednisone; ceftriaxone (09/06-11/06); azithromycin (09/06-10/06); ampicillin (17/06-22/06)	Discharged	Obesity; hypothyroidism; diabetes mellitus; SAH	COVID-19 SARS; acute renal failure; nosocomial pneumonia; hypernatremia
M015	2020-07-01	F	35	MILD	2020-06-11	2020-06-12	2020-06-13	None	Unmedicated	Transferred to another institute	Heavy drinker (0.5 liters distilled for 15-17 years); T12 fracture after first convulsive crisis (02/03) in life; arthrodesis (IOT) T10-L2 + medullary decompression (03/06); flaccid paraparesis of both lower limbs	SRAG due to COVID-19
M016	2020-07-01	M	49	MILD	2020-06-21	2020-06-23	2020-06-24	Third palliative line with CPT-11 + cetuximab; morphine 30 mg 6/6 h SN; dipyrone 40 drops 6/6 h SN; fentanyl 25 µg/day; venlafaxine 75 mg/day; Clexane 60 mg 12/12 h; Clavulin, ertapenem and ceftriaxone (March to April 2020); amikacin 15 mg/kg/day (21 days in April 2020)	Meropenem [day 0 (16/06) - day 17]; piperacillin-tazobactam 4.5 g every 6 h (15/06-19/06); tranexamic acid	Discharged	Rectosigmoid adenocarcinoma metastatic to liver/peritoneum/LFN; with massive pelvic mass and bilateral hydroureteronephrosis (with obstructive nephropathy) with nephrostomy on 18/06/20; deep venous thrombosis of lower limb	Asymptomatic for COVID-19
M017	2020-07-01	M	45	MILD	2020-06-20	2020-06-29	2020-06-29	UK	Azithromycin (27/06-01/07); ceftriaxone (29/06-01/07); prednisone (27/06)	Discharged	Alcoholic 3 drinks/day + 3 beer bottles/day	SRAG - Covid-19
M018	2020-07-06	F	33	MILD	2020-05-20	2020-06-02	2020-06-02	UK	Warfarin; enoxaparin; prednisone 20 mg	Discharged	X	Episode of sinus bradycardia; SARS due to COVID-19; pressure ulcer
M019	2020-07-08	F	46	MILD	2020-06-27	2020-06-30	2020-07-01	Metoclopramide	Tazocin (29/06-01/07); vancomycin (29/06-14/07) and fluconazole (02/07-12/07); azithromycin (29/06-01/07); ceftriaxone (16/06-28/06); enoxaparin; dexamethasone	Discharged	Metastatic cholangiocarcinoma to the peritoneum; olangitis and bacteremia; isolated S. aureus (bile) and E. faecium (blood)	SRAG - Covid-19
M020	2020-07-08	M	49	MILD	2020-06-15	2020-06-25	2020-06-24	Hydrochlorothiazide; losartan	Enoxaparin; losartan; ceftriaxone 2 g IV 1x/day (20/06); clarithromycin 500 mg VO 12/12 h (21/06); hydrocortisone 1 g IV/day (20/06); hydroxychloroquine 400 mg VO 1x/day (21/06); omeprazole 40 mg IV 12/12 h; enoxaparin 80 mg SC 12/12 h; tigecycline (06/07-15/07) para acineto secreção traqueal; vancomycin 04/07-16/07 for S. aureus secreção traqueal; Tazocin (03/07-05/07); ceftriaxone; azithromycin…	Discharged	HAS; obesity; ex-smoker	SARS; Acinetobacter pneumonia in tracheal secretion culture; delirium; sacral ulcer
M021	2020-07-20	M	40	MILD	2020-07-11	2020-07-17	2020-07-17	Mycophenolate 360 mg 2x/day; tacrolimus 12 mg 2x/day; prednisone 20 mg/day; prophylactic Bactrim	Bactrim; enoxaparin; dexamethasone; quetiapine; diazepam; mycophenolate; ceftriaxone; azithromycin	Discharged	Hepatic cirrhosis due to autoimmune hepatitis; PO tx-hepatic (cadaver donor; 03/07/2020); pulse therapy 1 g methylprednisone D3/D3 (finished) - RCA without biopsy; hepatic Doppler with normal vascularization (09/07/2020)	SRAG Covid-19
M022	2020-07-20	F	35	MILD	2020-07-11	2020-07-15	2020-07-12	Folic acid	Enoxaparin; ferrous sulphate; carvedilol; insulin E; oseltamivir; furosemide; penicillin G benzathine; folic acid; fosfomycin	Transfered to another institute	Pregnant woman 2nd trimester; severe mitral stenosis	SARS Covid-19; urinary tract infection
M023	2020-07-20	F	38	MILD	2020-07-13	2020-07-13	2020-07-13	Contraceptive	Enoxaparin; levetiracetam; daptomycin (03/07-13/07); tigecycline (08/07-13/07); levofloxacin (08/07-13/07); meropenem (03/07-08/07)	Discharged	Cavernous sinus thrombosis; postoperative decompressive craniectomy	SARS Covid-19; deep vein thrombosis; bloodstream infection
M024	2020-07-20	F	44	MILD	2020-06-10	2020-07-15	2020-07-15	Mycophenolate 540 mg 12/12 h; prednisone 5 mg 1x/day; tacrolimus 2 mg morning and 1 mg evening; sulfamethoxazole + trimethoprim 400/80 mg 1x/day; atenolol 50 mg 1x/day; allopurinol 100 mg 1x/day; omeprazole 20 mg 1x/day; sodium bicarbonate 1,000 mg 2x/day; magnesium sulfate 500 mg 2x/day; cholecalciferol 25 milU 15 in 15 days	Bactrim; ceftriaxone; unfractionated heparin; prednisone; atenolol; tacrolimus	Discharged	Kidney transplant (2019); SAH	SARS Covid-19; acute renal failure
M025	2020-07-29	M	49	MILD	2020-06-29	2020-06-29	2020-06-30	Tenofovir; lamivudine; efavirenz (irregular treatment since 2018)	Valproate 250 mg 12/12 h; quetiapine 100 mg 8/8 h; haloperidol 5 mg 8/8 h; enoxaparin; diazepam; promethazine; chlorpromazine; lamivudine; tenofovir; efavirenz	Medical record not available	Street drug addiction; HIV 10 years ago, CD4 487, CV 512; alcoholism; run over in 2014 with head trauma and neurotoxoplasmosis sequelae; chronic liver disease of probable alcoholic etiology	SARS COVID-19; acute renal failure; sepsis and exogenous intoxication; decubitus ulcer
M026	2020-08-03	M	42	MILD	2020-06-18	2020-06-27	2020-06-25	UK	Unfractionated heparin; erythropoietin; amlodipine besylate; furosemide; atenolol; hydralazine; clonidine; losartan; Tazocin (day 0, 20/07)/meropenem (day 0, 25/07); ceftriaxone; oseltamivir	Discharged	SAH	SARS due to COVID-19; acute renal failure; pneumonia
M027	2020-08-05	F	39	MILD	2020-07-17	2020-07-20	2020-07-20	Insulin	NPH insulin; enoxaparin; levothyroxine; sodium divalproex; warfarin; azithromycin; ceftriaxone; dexamethasone; oseltamivir	Discharged	Diabetes mellitus; SAH; obesity	SARS due to COVID-19
M028	2020-08-05	F	44	MILD	2020-05-13	2020-05-28	2020-05-28	Fluoxetine	Enoxaparin; sertraline; gabapentin; clonazepam; prednisone; azithromycin; levofloxacin	Discharged	Obesity; depressive disorder; hepatitis C	SARS due to COVID-19
M029	2020-08-05	F	49	MILD	2020-07-05	2020-07-21	2020-07-17	AAS 100 mg; enalapril 20 mg; simvastatin 20 mg; hydrochlorothiazide 25 mg; metformin 500 mg; NPH + regular insulin	Enoxaparin; NPH insulin; insulin R; tamsulosin; AAS; atorvastatin; atenolol; zolpidem; ceftriaxone; azithromycin; dexamethasone; furosemide	Discharged	Diabetes mellitus; SAH	SARS due to COVID 19; acute renal failure; stroke
M030	2020-08-10	F	33	MILD	2020-07-22	2020-07-31	2020-08-05	Propranolol 40 mg 1x/day; levothyroxine 100 µg 1x/day; tacrolimus 1 mg 12/12 h; mycophenolate 540 12/12 h; prednisone 5 mg 1x/day; valaciclovir 1x/night (dose unknown)	Unfractionated heparin; prednisone; tacrolimus; mycophenolate; propranolol; levothyroxine; omeprazole; meropenem; azithromycin	Discharged	Kidney transplantation in 2014 and 2019 by GESP; SAH; hypothyroidism; ovarian cyst	COVID-19 pneumonia; pyelonephritis; acute renal failure
M031	2020-08-10	M	43	MILD	2020-07-30	2020-08-03	2020-08-02	Folic acid	Enoxaparin; insulin R; azithromycin; ciprofloxacin; metronidazole; benzathine penicillin; amoxicillin	Discharged	Sickle cell anemia; hepatitis C positive in 1997; deep vein thrombosis; chronic calculous cholecystopathy	COVID-19 pneumonia
M032	2020-08-12	M	35	MILD	2020-07-14	2020-07-30	2020-07-29	Metformin 850 mg 1x/day; captopril 25 mg 1x/day	Insulin R and NPH; remdesivir; Xarelto; warfarin; ceftriaxone	Discharged	SAH; diabetes mellitus; obesity	SARS COVID-19; pulmonary thromboembolism
M033	2020-08-12	F	49	MILD	2020-06-27	2020-08-01	2020-08-01	Carvedilol 6.25 mg - 1 tablet 12/12 h; losartan 50 mg; levothyroxine	Bactrim; unfractionated heparin; levothyroxine; dexamethasone; hydrochlorothiazide; furosemide; carvedilol; tacrolimus; tazocin	Death	Chronic renal failure; hypothyroidism; kidney transplant (2018)	SARS COVID-19; acute renal failure; chronic renal failure; nosocomial pneumonia; deep vein thrombosis
M034	2020-08-19	F	33	MILD	2020-08-08	2020-08-13	2020-08-12	Simvastatin 20 mg 1x/day; aspirin 100 mg 1x/day; glibenclamide 30 mg 2x/day; Glyciphage 500 mg 3x/day; losartan potassium 50 mg 2x/day; NPH 15-15-10; atenolol 25 mg 2x/day; fluoxetine 20 mg 1x/day	Amoxicillin; dexamethasone; enoxaparin; clindamycin; ceftriaxone; tazocin; vancomycin	Discharged	SAH; obesity; diabetes mellitus; depression; acute myocardial infarction 9 months previous	COVID-19 pneumonia; thigh abscess
M035	2020-08-19	F	42	MILD	2020-07-26	2020-08-06	2020-08-06	Losartan; NPH + R insulin	Insulin R + NPH; rivaroxaban; warfarin; enoxaparin; ceftriaxone; azithromycin; dexamethasone; heparin	Discharged	SAH; insulin dependent diabetes mellitus	SARS COVID-19; deep vein thrombosis
M036	2020-08-24	F	44	MILD	2020-08-06	2020-08-21	2020-08-20	UK	Hydroxychloroquine; azithromycin; enoxaparin; ceftriaxone	Discharged	Migraine (medication unknown); tubal ligation for years; obesity	SARS due to COVID-19
M037	2020-09-01	F	33	MILD	2020-08-21	2020-08-27	2020-08-27	Hydroxychloroquine 200 mg 1x/day; amlodipine 5 mg 2x/day; atenolol 50 mg 1x/day; allopurinol 100 mg 1x/day; calcitriol 0.5 µg 2x/day; Vitamin D 7 drops 1x/week; omeprazole 20 mg fasting; sodium bicarbonate 500 mg 3x/day; sertraline 50 mg 1x/day; ferrous sulfate 80 mg 3x/day	Azithromycin; ceftriaxone; hydroxychloroquine; unfractionated heparin; allopurinol; furosemide; atenolol; dexamethasone; oseltamivir	Discharged	Systemic lupus erythematosus; chronic kidney disease; SAH	Acute chronic kidney disease; SARS - COVID-19
M038	2020-09-16	M	47	MILD	2020-09-13	2020-09-15	2020-09-15	UK	Hydrocortisone; prednisone; tacrolimus 7 mg every 12 h; mycophenolate 540 mg every 12 h; ceftriaxone; metronidazole; Tazocin; rifampicin; isoniazid; insulin; unfractioned heparin	Medical record not available	Pulmonary tuberculosis under treatment (since 06/2020); 2nd kidney transplant from deceased donor (19/11/2010; panel reactive antibody, 0%; anti-thymocyte globulin, 35-h cold-ischemia time); underlying disease, chronic glomerulonephritis; 1st transplant (1997-2004), graft loss due to urinary fistula and calculus, transplantectomy (2004), right fossa; perforating acute abdomen due to perforated di…	SARS COVID-19; cardiomyopathy; acute chronic kidney disease
M039	2020-10-14	F	43	MILD	2020-09-26	2020-10-04	2020-10-03	UK	Hydrocortisone + diphenhydramine; dexamethasone; azithromycin (26/09-30/09); ceftriaxone (day 0, 30/09); clarithromycin (day 0, 30/09); insulin; unfractionated heparin	Discharged	SAH; dialytic chronic kidney disease due to polycystic disease; kidney transplant (2001) with graft loss (2012); incisional hernia in IEF	SARS due to COVID-19
S001	2020-05-18	M	50	SEVERE	2020-04-19	2020-04-24	2020-04-23	UK	Ceftazidime (13/05-16/05); oxacillin (29/04-06/04); vancomycin (05/05-11/05); meropenem (29/04-13/05); colistin (12/05-13/05); NPH insulin; prophylactic enoxaparin	Death on 25/05	Splenectomy (2008)	Severe acute respiratory syndrome: COVID-19 +; ventilator-associated pneumonia by oxacillin-sensitive S. aureus and Klebsiela ESBL; ventilator-associated pneumonia by Pseudomonas aeruginosa (mero-I, imipenem-R); acute renal failure - resolved; catheter-related bloodstream infection by treated Staphylococcus capitis; Klebsiela ESBL blood stream infection; post-COVID-19 fibrosis; decubitus ulcer
S002	2020-05-18	F	43	SEVERE	2020-04-10	2020-04-20	2020-04-18	UK	Azithromycin (18/04-21/04); enoxaparin 60 mg SC in the morning and 80 mg SC at night; Marevan 5 mg/day + 7.5 mg at the weekend; fluoxetine 20 mg/day; ceftriaxone (18/04-25/04); colistin (30/04-02/05); Torgena (05/05-19/05)	Discharged	UK	SRAG due COVID-19 confirmed in ST (20/04); blood flow infection by KPC colistin R (positive blood culture) - treated; chronic renal failure already resolved; grade II sacral ulcer; partial DVT in the right common femoral vein with onset of full anticoagulation on 08/06; exacerbated physiological tremor and essential tremor syndrome, precipitated by severe clinical condition + polypharmacy + clini…
S003	2020-05-27	M	43	SEVERE	2020-04-30	2020-05-09	2020-05-09	UK	Prophylactic heparin; hydroxychloroquine (08/05 only); methylprednisolone (17/05); azithromycin (09/05); ceftriaxone (09/05-10/05)	Discharged	Obesity	Pressure ulcer; SARS from COVID-19
S004	2020-05-27	F	51	SEVERE	2020-04-29	2020-05-05	2020-05-06	UK	Heparin not fractionated full dose; linezolid (14/05-21/05); polymyxin (15/05-22/05); cefepime (05/05-07/05); ceftriaxone and azithromycin (20/03-29/03)	Discharge for referral to another hospital	HAS; former smoker (6 months ago); vancomycin allergy	SRAG; acute kidney disease; pulmonary thromboembolism; DRESS syndrome - resolved; pseudomembranous colitis resolved; spinal cord ischemia from aortic dissection? Critically ill neuropathy?
S005	2020-06-01	F	44	SEVERE	2020-05-19	2020-05-26	2020-05-26	Prednisone 30 mg 1x/day; Mestinon 60 mg 7x/day; omeprazole 20 mg 1x/day; folic acid 5 mg/day; methotrexate 15 mg/day; calcium carbonate 1,250 mg 1x/day; vitamin D 10 gts/day	Enoxaparin; ceftriaxone (26/05-28/05); prednisone 40 mg; methotrexate 15 mg weekly; pyridostigmine	Medical record not available	Myasthenia gravis; thymectomy (12/2015); diabetes mellitus; obesity	SRAG COVID-19
S006	2020-08-06	F	46	SEVERE	2020-06-01	2020-06-05	2020-06-05	Prednisone 5 mg 1x/day; cyclosporine 150 + 125 mg; diltiazem 60 mg 3x/day; mycophenolate 360 + 360; omeprazole 40 mg 2x/day; atorvastatin 10 mg 1x/day; levothyroxine 50 µg 1x/day; vitamin D 50,000 IU/week; daily Dipirona; tramadol daily; bromazepam 3 mg 1x/day; sertraline 50 mg 1x/day; gapabentin 300 mg 2x/day; acyclovir 200 mg 2x/day	Convalescent plasma (09/06); azithromycin (04/06-12/06); Tazocin (from 12/06); teicoplanin (from 12/06); fluconazole 400 mg 12/12 h (13/06); ceftriaxone (04/06-12/06); oseltamivir (04/06); unfractionated heparin; methylprednisolone 80 mg/day (since 06/06)	Death	Bicaval orthotic heart transplantation (11/06/2015); femulopoplite-fibular deep vein thrombosis (04/2016); necrosis of 2 and 3 right toes + proximal transphalangeal amputation of 2-3 toes (05/2016); distal embolization; cholecystectomy (2018); moderate restrictive ventilatory disorder; chronic kidney disease [baseline Cr 2.14 (21/02) Cl Cr 27, CKD EPI]; hypothyroidism	SRAG due to COVID-19; acute chronic kidney disease; sinus aquicardia
S007	2020-08-06	M	34	SEVERE	2020-05-21	2020-05-28	2020-05-27	Tacrolimus; sirolimus; prednisone 5 mg; carvedilol 37.5 mg 3x/day; spironolactone 40 mg 2x/day; furosemide 40 mg 1x/day; ticagrelor 90 mg 2x/day; isosorbide 2x/day; Apresoline 2x/day; AAS 100 mg 1x/day; enalapril 10 mg 1x/day	Azithromycin (27/05-31/05); ceftriaxone (27/05-28/05); piperacycline + tazobactam (28/05-04/06); vancomycin (06/06-15/06); colistin (06/06-15/06); meropenen (06/06-15/06); ivermectin 6 mg (11/06, only dose); sulfamethoxazole + trimethoprim (11/06-15/06); fluconazole (14/06-15/06); methylprednisone 60 mg (27/05-15/06)	Discharge for referral to another hospital	Cardiac inefficiency since 2013; rheumatic carditis; cardiac TX from April 2014; toxoplasmosis (2015); AMI (2019; vascular graft disease)	Severe SRAG due to COVID-19; nosocomial pneumonia (06/06); chronic renal Ins Agudizada
S008	2020-06-15	M	43	SEVERE	2020-06-03	2020-06-10	2020-06-09	UK	Azithromycin (09/06-10/06); heparin; ceftriaxone (09/06-10/06); salbutamol; Tazocin (12/06-14/06); vancomycin (14/06-20/06); meropenem (15/06-21/06); insulin NPH (17/06); methylprednisolone (since 15/06); metronidazole (20/06-current)	Discharged	Asthma; SAH; ascending aorta aneurysm; heart failure	SRAG due to COVID-19; left ventricular dysfunction; septic shock
S009	2020-06-15	M	38	SEVERE	2020-06-01	2020-06-08	2020-06-08	Losartan potassium 50 mg 1x; amlopidine besylate 5 mg; spironolactone 25 mg 1x; metformin 850 mg 1x; human insulin isophane (NPH) 100 IU/ml vial 10 ml (20 IU SC); carvedilol 25 mg 1x	Azithromycin (08/06-14/06); ceftriaxone (08/06-09/06); methylprednisolone 60 mg 12/12 h (from 10/06); insulin NPH (from 10/06); heparin; metformin 850 mg 12/12 h (16/06); Tazocin (11/06-16/06)	Death	Diabetes mellitus; SAH; cardiac insufficiency; obesity; right lower limb repeatery	SRAG due to COVID-19; decompensated heart failure; hypertensive crisis
S010	2020-06-15	F	44	SEVERE	2020-05-31	2020-06-12	2020-06-12	UK	Ceftriaxone (06/06-09/06); azithromycin (06/06-09/06); Tazocin (09/06-12/06); meropenem (12/06-20/06); vancomycin (12/06-20/06); tocilizumab 4 mg/kg (12/06); Solu-Medrol 30 mg 12/12 h (12/06) -> 20 mg 12/12 h (17/06); enoxaparin	Discharged	UK	SARS COVID-19; sinus tachycardia
S011	2020-06-17	M	28	SEVERE	2020-05-07	2020-05-30	2020-04-11	Allodipine 5 mg (12/12); Renagel 3x/day	Tazocin + vancomycin (12/04-16/04); oseltamivir (12/04-14/04); azithromycin (12/04-16/04); vancomycin and colistin (01/06-03/06); vancomycin and gentamicin (11/05-19/05); unfractionated heparin	Discharged	Aortic valve infective endocarditis with biological valve replacement (2016); first admission to HC without a diagnosis of COVID (19/03-26/03); onset of symptoms (fever and cough) -> Hospital Pedreira (Dx. pneumonia with ATB for 7 days); rehospitalization at Pedreira for fever, cough and dyspnea (31/03-09/04); admitted to the HC for ARF -> OTI / sepsis with a pulmonary focus (isolated Acinetobact…	SARS due to COVID-19; acute renal failure
S012	2020-06-22	F	43	SEVERE	2020-06-06	2020-06-12	2020-06-13	Carvedilol 12.5 mg every 12 h; enalapril 5 mg 2x/day; Aldactone 25 mg 1x/day; furosemide 80 mg 2x/day; omeprazole 20 mg 2x/day; warfarin 5 mg according to PT; amiodarone 200 mg twice daily; levothyroxine 75 µg 1x/day; hydrochlorothiazide 1x/day	Heparin; dobutamine; Tazocin (23/06 - transfer); hydrochlorothiazide 25 mg 1x/day	Transferred to another institute	Idiopathic dilated cardiomyopathy; latent syphilis; atrial fibrillation; SAH; high-grade intraepithelial lesion; hypothyroidism	SRAG-Covid-19
S013	2020-06-22	F	38	SEVERE	2020-06-09	2020-06-15	2020-06-15	None	Heparin 5000 8/8 h; azithromycin (13/06-15/06); ceftriaxone (13/06-15/06)	Transferred to another ward	Obesity	SARS COVID-19; pneumonia associated with mechanical ventilation (Pseudomonas); diarrhea due to probable Clostridium; delivery on 06/15 due to acute fetal distress; chronic kidney failure
S014	2020-06-22	M	47	SEVERE	2020-06-06	2020-06-10	2020-06-13	Losartan 50 mg 12/12 h; hydrochlorothiazide 25 mg once a day	Enoxaparin; ceftriaxone (13/06-16/06); azithromycin (08/06-13/06); dexamethasone 6 mg/day (16/06-26/06)	Discharged	Thalassemia minor; SAH	SRAG due to COVID-19
S015	2020-06-22	F	41	SEVERE	2020-06-07	2020-06-18	2020-06-18	UK	Azithromycin (08/06-13/06); ceftriaxone (16/6-17/6); Tazocin (18/6-25/6); prednisone (17/06-24/06)	Discharged	Asthma	Bacterial pneumonia
S016	2020-06-24	M	40	SEVERE	2020-06-07	2020-06-17	2020-06-17	UK	Colistin (from 26/06); Tazocin (16/06-17/06); Tazocin (25/06-26/06); ceftriaxone; azithromycin and oseltamivir (10/06-15/06); heparin	Discharged	Obesity; former smoker, quit 10 years ago (smoking load, 10 pack years)	SARS due to COVID-19; acute renal failure
S017	2020-06-24	M	46	SEVERE	2020-06-19	2020-06-23	2020-06-23	UK	Oseltamivir (22/06-23/06);, azithromycin (22/06-01/07); ceftriaxone (23/06-01/07) and hydroxychloroquine (22/06); dexamethasone (since 23/06); enoxaparin	Discharged	UK	SRAG due to COVID-19
S018	2020-06-24	M	43	SEVERE	2020-06-14	2020-06-18	2020-06-17	Atenolol; furosemide 80 mg 2x/day; spironolactone 25 mg/day	Enoxaparin; spironolactone; captopril (replaced by enalapril); carvedilol; hydrocortisone (16/06); ceftriaxone and azithromycin	Discharged	Dilated cardiomyopathy + cardiac arrhythmia (diagnosed 12/2019)	SRAG due to COVID-19; cardiac decompensation
S019	2020-06-24	F	34	SEVERE	2020-06-01	2020-06-05	2020-06-05	UK	Enoxaparin; ceftriaxone (05/06-10/06); azithromycin (05/06-06/06); oseltamivir (05/06-06/06); vancomycin (10/06-24/06); Tazocin (10/06-13/06); meropenem (14/06-18/06 and from 22/06); colistin (18/06-20/06 and from 22/06); methylprednisolone; ceftazidime (21/06); insulin; hydralazine; amlodipine besylate 5 mg 12/12 h; losartan potassium 50 mg 12/12 h; HCTZ 50 mg 12/12 h and diltiazem 30 mg 6/6 h	Discharged	Obesity, BMI 53; diabetes mellitus; SAH	SRAG due to COVID-19; grade III sacral ulcer; hypernatremia
S020	2020-07-01	F	30	SEVERE	2020-06-24	2020-06-28	2020-06-28	None	NPH insulin; enoxaparin; ceftriaxone (28/06-05/07); azithromycin (28/06-03/07); oseltamivir (29/06); dexamethasone (29/06)	Discharged	Grade III obesity; chronic calculous cholecystopathy	SRAG due to COVID; corticosteroid hyperglycemia; hypokalemia and metabolic alkalosis
S021	2020-07-01	F	44	SEVERE	2020-06-04	2020-06-09	2020-06-08	UK	Piperacilin-tazobactam (14/06-17/06); vancomycin (17/06-19/06); oxacillin (19/06-02/07) + piperacilin-tazobactam (19/06-25/06); ciprofloxacin (25/06-02/07); nystatin (13/06-20/06); enoxaparin; NPH insulin; sertraline; clonazepam	Discharged	Anxiety disorder; diabetes mellitus	Bloodstream infection; acute kidney failure; SRAG due to COVID-19
S022	2020-07-01	M	46	SEVERE	2020-06-24	2020-06-26	2020-06-26	Induction, basiliximab; maintenance, mycophenolate + tacrolimus + prednisone, levothyroxine	Ceftriaxone + azithromycin (26/06); Bactrim (prophylactic)	Death	Kidney transplant (14/06/20); diagnosed chronic kidney disease (2002); started HD in 2013; MPG with IF full house, lupus-like / cryoglobulinemia?; pulmonary tuberculosis (04/2011); hypothyroidism; renal cell carcinoma; D nephrectomy (08/2014); tuberculous pericarditis; presumed hypothyroidism (04/2017)	Septic shock (05/07), probable pulmonary focus; MSE venous thrombosis; hemodynamic worsening (10/07) with refractory shock
S023	2020-07-06	M	39	SEVERE	2020-06-22	2020-06-30	2020-06-30	Galvus Met 50/100 2x/day	Heparin; NPH insulin; ceftriaxone (29/06-01/07); azithromycin (29/06-01/07); oseltamivir (29/06-01/07); dexamethasone 6 mg	Death	Obesity, diabetes mellitus, SAH	SRAG - Covid-19
S024	2020-07-06	M	45	SEVERE	2020-06-18	2020-06-27	2020-06-27	Enalapril 10 mg/day	Ceftriaxone (22/06-27/06); azithromycin (22/06-27/06); dexamethasone; enoxaparin 40 mg 1x/day; amlodipine besylate; enalapril	Discharged	SAH	SRAG - Covid-19
S025	2020-07-15	M	38	SEVERE	2020-06-16	2020-06-29	2020-06-26	None	Insulin R; NPH insulin; risperidone; metformin; ceftriaxone + azithromycin; dexamethasone and enoxaparin; meropenem (02/07); fluconazole (14/05); colistin (18/07); Tazocin	Discharged	Diabetes mellitus	SRAG - Covid-19
S026	2020-07-23	M	46	SEVERE	2020-06-01	2020-06-11	2020-06-11	None	Amiodarone; insulin R; unfractionated heparin; hydroxychloroquine; azithromycin; meropenem; vancomycin; Bactrim	Death	Deny	SARS COVID-19; aspiration pneumonia
S027	2020-07-23	F	29	SEVERE	2020-07-05	2020-07-15	2020-07-15	Ferrous sulfate 1-0-0; folic acid 5 mg 1-0-0	Ceftazidime; hydrocortisone; unfractionated heparin; amiodarone; Tazocin; dexamethasone	Medical record not available	29 weeks pregnant on the day of admission	SARS COVID-19; acute renal failure; post-op cesarean section, pnagastritis; necrotizing pneumonia due to Pseudomomas
S028	2020-07-27	M	42	SEVERE	2020-06-26	2020-06-25	2020-06-26	Mycophenolate; tacrolimus; prednisone; losartan; atenolol; amlodipine besylate; B complex; omeprazole; renagel; paricalcitol; ferrous sulphate; AAS 100 mg/day; erythropoietin 4,000 1x/week	Furosemide; Bactrim; unfractionated heparin; tacrolimus; prednisone; ceftriaxone (25/06-28/06); azithromycin (25/06-28/06); oseltamivir (25/06-26/06); PCR influenza negative (26/06) ; linezolid (28/06-4/07); ceftazidime (02/07-05/07); vancomycin (18/07-21/07)	Medical record not available	Kidney transplant (06/2020); SAH; former smoker; ex-alcoholic	SARS COVID-19; acute renal failure; bloodstream infection
S029	2020-07-27	F	45	SEVERE	2020-07-07	2020-07-15	2020-07-14	None	Unmedicated	Death	SAH; obesity	SARS COVID-19; acute renal failure; pneumonia
S030	2020-08-10	M	33	SEVERE	2020-07-11	2020-07-24	2020-07-14	None	Meropenem; vancomycin; insulin R; methylprednisolone; unfractionated heparin; valproic acid; Tazocin; acyclovir; oxacillin	Death	Anti-NMDA encephalitis (2018); vitiligo; grade 1 obesity; malignant neuroleptic sd (2018)	SARS COVID-19; refractory hypoxemia
S031	2020-08-17	M	47	SEVERE	2020-07-23	2020-08-06	2020-08-06	Triptan	Unfractionated heparin; vancomycin; levofloxacin; fluconazole; Tazocin; insulin R; methylprednisolone; risperidone; methadone; furosemide	Discharged	Migraine	Tongue biting wound (19/08); refractory septic shock (21/08); SARS due to COVID-19
S032	2020-08-17	M	46	SEVERE	2020-08-06	2020-08-15	2020-08-14	UK	Unfractionated heparin; furosemide; tranexamic acid; Tazocin; ceftriaxone; azithromycin; enoxaparin; dexamethasone; furosemide; amlodipine; hydralazine	Discharged	Obesity, BMI 33	Perforating/vascular acute abdomen; SARS due to COVID
S033	2020-08-19	F	36	SEVERE	2020-04-17	2020-04-29	2020-04-28	UK	Azithromycin; oseltamivir; meropenem; vancomycin; enoxaparin	Discharged	SAH; obesity	SARS due to COVID-19; ventilator-associated pneumonia; septic shock; deep vein thrombosis; acute renal failure; colitis; sacral ulcer; gastric ulcer
S034	2020-08-19	F	46	SEVERE	2020-08-03	2020-08-14	2020-08-14	None	Enoxaparin; dexamethasone; diphenhydramine; REMDACTA protocol; ceftriaxone; azithromycin; methylprednisolone	Discharged	Obesity	SARS due to COVID-19; pharmacodermia
S035	2020-08-24	F	48	SEVERE	2020-08-12	2020-08-22	2020-08-21	Norethisterone acetate 10 mg/day	Enoxaparin; warfarin; enalapril; hydrochlorothiazide; salbutamol; formoterol; azithromycin; ceftriaxone; dexamethasone	Discharged	Overweight; asthma; myoma	SARS due to COVID-19; pulmonary thromboembolism
S036	2020-09-02	M	45	SEVERE	2020-08-27	2020-09-01	2020-09-01	Mestinon 60 mg 4/4 h; prednisone 20 mg/day (guided to increase dose to 40 mg/day when weakness was felt; used 40 mg/day for 1 month); azathioprine 50 mg 8/8 h; metformin	Azathioprine; hydrocortisone 200 mg EV 8/8 h; ceftriaxone; azithromycin; clindamycin; insulin; cephalexin; enoxaparin	Discharged	Myasthenia gravis; diabetes mellitus	SARS due to COVID -19; pulmonary thromboembolism
S037	2020-09-22	M	42	SEVERE	2020-09-05	2020-09-13	2020-09-13	Levomepromazine 4 mg/day	Ceftriaxone; azithromycin (12/09-13/09); benzathine penicillin; prednisone; enoxaparin; dexamethasone	Discharged	Meningitis at 3 months of age with neuropsychomotor development sequelae; obesity, BMI 28	SARS due to Covid-19; acute renal failure; mild hepatitis
S038	2020-09-23	M	31	SEVERE	2020-04-24	2020-05-07	2020-05-07	Prednisone 5 mg/day; tacrolimus 5 mg 12/12 h; metronidazole 500 mg 8/8 h; Bactrim 400 mg + 80 1x/day; amlodipine besylate 5 mg 12/12 h; omeprazole 20 mg; sodium bicarbonate 1 g 8/8 h; thiamazole 10 mg 1x/day	Azithromycin; ceftriaxone; heparin; ganciclovir; mycophenolate; Bactrim; metronidazole; tacrolimus; prednisone; hydrochlorothiazide; fresh frozen plasma	Discharged	Cytomegalovirus; kidney transplantation due to GNC; hyperthyroidism	Respiratory Sd > COVID positive (nasopharyngeal swab, 07/05); acute graft dysfunction; recent TMA - crescent and collapse in 1 glomerulus; nephrotic syndrome? recurrence of underlying disease? GESF? active rejection mediated by Banff IB cells; Sd diarrheal by blastocytosis (treated); CMV PCR detected (72-104); UTI due to VRE under treatment
S039	2020-09-28	F	48	SEVERE	2020-09-15	2020-09-22	2020-09-22	Silimalon	Enoxaparin; prednisone 40 mg 12/12 h; azithromycin; ceftriaxone; insulin R; ketoprofen	Discharged	Obesity; migraine; obstructive sleep apnea; hepatic steatosis	SRAG due to COVID 19
S040	19/20/20	M	49	SEVERE	2020-10-03	2020-10-10	2020-10-10	UK	Bactrim; dexamethasone; ceftriaxone; omeprazole 20 mg/day; enoxaparin; clindamycin; levofloxacin; IV thiamine; furosemide; risperidone	Death	Free area resident; heavy drinker	Bloodstream infection: Stenotrophomonas; reversed acute liver injury; PTE? -> DVT in superficial femoral vein (20/10); SARS, secondary to COVID + probable bronchoaspiration pneumonia
In the donor codes, M signifies mild and S signifies severe. COVID-19, coronavirus disease 2019; M, male; F, female; UK, unknown.
